# Supplementary material for: Data sharing practices of medicines related apps and the mobile ecosystem: traffic, content, and network analysis
Source: HighWire-hosted journal article supplement (doi:10.1136/bmj.l920), 2019-03-20
Supplement: Update.pdf [file Update.pdf]

## **Data sharing practices of medicines related apps and the mobile ecosystem: traffic, content, and network analysis**

Update to this research article (*BMJ* 2019;364:l920, doi:10.1136/bmj.l920): We have been contacted by Ada Health GmbH, the developer of the Ada-Your Health Companion application. This study sets out the authors' findings based on a detailed analysis of the data sharing practices of a number of mobile health applications. For the avoidance of doubt, it is not suggested (unless otherwise indicated) that individual applications share personal data (as defined in the General Data Protection Regulation) for commercial purposes. Ada Health has explained that its application does not share personal data with third parties for commercial use and that Ada Health hosts personal data within their private space with infrastructure providers, such as Amazon Web Services and Microsoft Azure, and certain analytics providers, in order to assist with the technical functioning of the application.
